# Supplementary material for: Effectiveness of an Annular Closure Device to Prevent Recurrent Lumbar Disc Herniation: A Secondary Analysis With 5 Years of Follow-up
Source: PubMed Central journal article supplement — JAMA Netw Open. 2021 Dec 9;4(12):e2136809. doi: 10.1001/jamanetworkopen.2021.36809 (PMC8662371; doi:10.1001/jamanetworkopen.2021.36809), 2021-12-09
Supplement: jamanetwopen-e2136809-s003.pdf [file jamanetwopen-e2136809-s003.pdf]

## Supplemental Online Content

Thomé C, Kuršumović A, Klassen PD, et al; Annular Closure RCT Study Group. Effectiveness of an annular closure device to prevent recurrent lumbar disc herniation. *JAMA Netw Open*. 2021;4(12):e2136809. doi:10.1001/jamanetworkopen.2021.36809

**eTable 1.** List of Investigators and Participating Centers in the Annular Closure RCT Study Group

**eTable 2.** Inclusion and Exclusion Criteria

**eTable 3.** Study Assessments at Each Follow-up Interval

**eTable 4.** Reoperations by Type and Timeframe through 5 Years

**eTable 5.** Serious Adverse Events Through 5 Years

**eTable 6.** Serious Device- and Procedure-related Adverse Events Through 5 Years

**eTable 7.** Any Adverse Events Through 5 Years

**eTable 8.** Any Device- and Procedure-related Adverse Events Through 5 Years

**eFigure 1.** Visual-Analogue Scale for Leg Pain Severity Over 5 Years Follow-up

**eFigure 2.** Oswestry Disability Index Score Over 5 Years Follow-up

**eFigure 3.** SF-36 Physical Component Summary Score Over 5 Years Follow-up

**eFigure 4.** SF-36 Mental Component Summary Score over 5 Years Follow-up

This supplemental material has been provided by the authors to give readers additional information about their work.

**eTable 1.** List of Investigators and Participating Centers.

| Site Name                                                           | Principal Investigator                               |
|---------------------------------------------------------------------|------------------------------------------------------|
| LKH Graz (Graz, Austria)                                            | Sandro Eustacchio                                    |
| ZNA Middelheim (Antwerp, Belgium)                                   | Robert Hes*                                          |
| OLVG-location West (Amsterdam, The Netherlands)                     | Gerrit J. Bouma                                      |
| St. Bonifatius Hospital GmbH (Lingen, Germany)                      | Peter Douglas Klassen                                |
| Klinikum Augsburg (Augsburg, Germany)                               | Volkmar Heidecke                                     |
| Charite-Virchow-Klinikum (Berlin, Germany)                          | Peter Vajkoczy                                       |
| University Medical Center Schleswig-Holstein (Kiel, Germany)        | Hubertus Mehdorn **<br>Senol Jadik<br>Charlotte Flüh |
| OLV Ziekenhuis (Aalst, Belgium)                                     | Frederic Martens                                     |
| Universitätsmedizin Mannheim (Mannheim, Germany)                    | Martin Barth †                                       |
| University Hospital Düsseldorf (Düsseldorf, Germany)                | Richard Bostelmann                                   |
| Donausar Klinikum Deggendorf (Deggendorf, Germany)                  | Stefan Rath                                          |
| Asklepios Westklinikum Hamburg (Hamburg, Germany)                   | Hans-Peter Köhler                                    |
| Isala Ziekenhuis (Zwolle, The Netherlands)                          | Willem Art van den Brink                             |
| Medical University Innsbruck (Innsbruck, Austria)                   | Claudius Thomé                                       |
| A.Z Nikolaas Hospital (St. Nikolaas, Belgium)                       | Erik Van de Kelft                                    |
| Haaglanden Medical Center: Antoniushove (Den Haag, The Netherlands) | Jasper Wolfs                                         |
| Haaglanden Medical Center: Westeinde (Den Haag, The Netherlands)    | Mark Arts                                            |

| Site Name                                                                                         | Principal Investigator           |
|---------------------------------------------------------------------------------------------------|----------------------------------|
| Kantonsspital Aarau (Aarau, Switzerland)                                                          | Javier Fandino<br>Jenny Kienzler |
| Knappschafts-Krankenhaus Bochum-Langendreer (Bochum, Germany)                                     | Martin Barth ‡                   |
| Centre Hospitalier Régional Universitaire de Lille (CHRU), Hôpital Roger Salengro (Lille, France) | Richard Assaker                  |
| Orthopädische Klinik und Poliklinik Universitätsmedizin Rostock (Rostock, Germany)                | Susanne Fröhlich                 |

\* PI moved to AZ Klina, Brasschaat, Belgium. EC approval at this site to follow patients enrolled at original site. PI at ZNA Middleheim now Guido Dua.

\*\* PI Mehdorn retired. Former Co-Investigator Flüh now PI.

† PI moved to Bochum, Germany, Perrin now PI.

‡ PI moved to Frankfurt, Germany, Brenke now PI.

**eTable 2.** Inclusion and Exclusion Criteria.

| <b>Inclusion Criteria</b>                                                                                                                                                                                                                                  |
|------------------------------------------------------------------------------------------------------------------------------------------------------------------------------------------------------------------------------------------------------------|
| 1. Age 21 to 75 years and skeletally mature (male or female)                                                                                                                                                                                               |
| 2. Posterior or posterolateral disc herniations at one level between L1 and S1 with confirmation of neural compression using MRI.[Note: Intraoperatively, only post-discectomy annular defects between 4 and 6 mm tall and 6 and 10 mm wide shall qualify] |
| 3. At least six weeks of failed, conservative treatment prior to surgery, including physical therapy, use of anti-inflammatory medications at maximum-specified dosage, and/or administration of epidural/facet injections                                 |
| 4. Minimum posterior disc height of 5mm at the index level                                                                                                                                                                                                 |
| 5. Radiculopathy (with or without back pain) with positive straight leg raise (0 –60 degrees) (L4/5, L5/S1) or femoral stretch test (L1/2, L2/3, L3/4 only)                                                                                                |
| 6. Oswestry Disability Index score of at least 40/100 at baseline                                                                                                                                                                                          |
| 7. Visual analog scale leg pain (one or both legs) score of at least 40/100 at baseline                                                                                                                                                                    |
| 8. Psychosocially, mentally, and physically able to fully comply with the clinical protocol and willing to adhere to follow-up schedule and requirements                                                                                                   |
| <b>Exclusion Criteria</b>                                                                                                                                                                                                                                  |
| 1. Spondylolisthesis grade II or higher (25% slip or greater)                                                                                                                                                                                              |
| 2. Requires spinal surgery other than a discectomy (with or without laminotomy) to treat leg/back pain (scar tissue and osteophyte removal is allowed)                                                                                                     |
| 3. Back or non-radicular leg pain of unknown etiology                                                                                                                                                                                                      |
| 4. Prior surgery at the index lumbar vertebral level                                                                                                                                                                                                       |
| 5. Patients with a SCORE of 6 or greater and a subsequent spine DXA T-score less than -2.0 at the index level. For herniations at L5/S1, the average T-score of L1-L4 shall be used                                                                        |
| 6. Clinically compromised vertebral bodies in the lumbosacral region due to any traumatic, neoplastic, metabolic, or infectious pathology                                                                                                                  |
| 7. Pathologic fractures of the vertebra or multiple fractures of the vertebra or hip                                                                                                                                                                       |
| 8. Scoliosis of greater than 10 degrees (both angular and rotational)                                                                                                                                                                                      |
| 9. Any metabolic bone disease                                                                                                                                                                                                                              |
| 10. Active infection, either systemic or local                                                                                                                                                                                                             |
| 11. Cauda equina syndrome or neurogenic bowel/bladder dysfunction                                                                                                                                                                                          |

|                                                                                                                                                                                                                                                                                                                                                                                                                       |
|-----------------------------------------------------------------------------------------------------------------------------------------------------------------------------------------------------------------------------------------------------------------------------------------------------------------------------------------------------------------------------------------------------------------------|
| 12. Severe arterial insufficiency of the legs or other peripheral vascular disease (Screening on physical examination for subjects with diminution or absence of dorsalis pedis or posterior tibialis pulses. If diminished or absent by palpation, then an arterial ultrasound is required with vascular plethysmography. Absolute arterial pressure below 50mm Hg at the calf or ankle level results in exclusion.) |
| 13. Significant peripheral neuropathy, defined as Type I or II diabetes or similar systemic metabolic condition causing decreased sensation in a stocking-like or non-radicular and non-dermatomal distribution in the lower extremities                                                                                                                                                                              |
| 14. Insulin-dependent diabetes mellitus                                                                                                                                                                                                                                                                                                                                                                               |
| 15. Morbidly obese, defined as a body mass index > 40 or weighing more than 100 lbs over ideal body weight                                                                                                                                                                                                                                                                                                            |
| 16. Active hepatitis, AIDS, or HIV                                                                                                                                                                                                                                                                                                                                                                                    |
| 17. Rheumatoid arthritis or other autoimmune disease                                                                                                                                                                                                                                                                                                                                                                  |
| 18. Known allergy to titanium, polyethylene, or polyester materials                                                                                                                                                                                                                                                                                                                                                   |
| 19. Baseline MRI cannot be obtained                                                                                                                                                                                                                                                                                                                                                                                   |
| 20. Pregnant or interested in becoming pregnant in the next three years                                                                                                                                                                                                                                                                                                                                               |
| 21. Active tuberculosis or history of tuberculosis in the past three years                                                                                                                                                                                                                                                                                                                                            |
| 22. History of active malignancy, defined as any invasive malignancy, except non-melanoma skin cancer, unless treated with curative intent with no signs or symptoms of malignancy for at least two years                                                                                                                                                                                                             |
| 23. Immunologically suppressed, defined as receiving steroids for more than one month over the past year                                                                                                                                                                                                                                                                                                              |
| 24. Current anticoagulation therapy other than aspirin, unless anticoagulation therapy may be suspended for surgery                                                                                                                                                                                                                                                                                                   |
| 25. Current chemical/alcohol dependency or significant psychosocial disturbance                                                                                                                                                                                                                                                                                                                                       |
| 26. Life expectancy of less than three years                                                                                                                                                                                                                                                                                                                                                                          |
| 27. Current involvement in active spinal litigation                                                                                                                                                                                                                                                                                                                                                                   |
| 28. Current involvement in another investigational study                                                                                                                                                                                                                                                                                                                                                              |
| 29. Incarceration                                                                                                                                                                                                                                                                                                                                                                                                     |
| 30. Any contraindication for MRI or CT scan (e.g., claustrophobia, contrast allergy)                                                                                                                                                                                                                                                                                                                                  |

**eTable 3.** Study Assessments at each Follow-up Interval.

| Assessment                            | Preop | Surgery | 6 weeks | 3 months | 6 months | 1 year | 2 years | 3 years | 4 years | 5 years |
|---------------------------------------|-------|---------|---------|----------|----------|--------|---------|---------|---------|---------|
| Informed consent                      | ■     |         |         |          |          |        |         |         |         |         |
| Demographics/medical history          | ■     |         |         |          |          |        |         |         |         |         |
| Pain medication                       | ■     | ■       | ■       | ■        | ■        | ■      | ■       | ■       | ■       | ■       |
| Clinical/neurologic exam              | ■     | ■       | ■       | ■        | ■        | ■      | ■       | ■       | ■       | ■       |
| Neutral lateral/anteroposterior x-ray | ■     | ■       | ■       | ■        | ■        | ■      | ■       | ■       | ■       | ■       |
| Flexion-extension x-ray               | ■     |         |         |          |          | ■      | ■       | ■       | ■       | ■       |
| Computed tomography                   | ■     |         |         |          |          | ■      | ■       | ■       | ■       | ■       |
| Magnetic resonance imaging            | ■     |         |         |          |          | ■      | ■       | ■       | ■       | ■       |
| Randomization                         |       | ■       |         |          |          |        |         |         |         |         |
| Adverse events *                      |       | →       | →       | →        | →        | →      | →       | →       | →       | →       |

\* Adverse events continuously monitored throughout the study.

**eTable 4.** Reoperations by Type and Timeframe through 5 Years.

| Reoperation Type           | Year 0-1  |           | Year 1-2 |           | Year 2-3 |           | Year 3-4  |          | Year 4-5 |          | Total     |           |
|----------------------------|-----------|-----------|----------|-----------|----------|-----------|-----------|----------|----------|----------|-----------|-----------|
|                            | Device    | Control   | Device   | Control   | Device   | Control   | Device    | Control  | Device   | Control  | Device    | Control   |
| Discectomy / decompression | 10        | 24        | 5        | 9         | 2        | 10        | 5         | 5        | 1        | 2        | 23        | 50        |
| Lumbar fusion              | 6         | 6         | 3        | 4         | 5        | 4         | 5         | 1        | 3        | 2        | 22        | 17        |
| Wound complication         | -         | 5         | -        | 1         | 1        | -         | -         | -        | -        | -        | 1         | 6         |
| Device removal             | 4         | -         | -        | -         | 1        | -         | -         | -        | -        | -        | 5         | 0         |
| Device implant             | -         | 3         | -        | 1         | -        | -         | -         | -        | -        | 1        | 0         | 5         |
| Hematoma                   | -         | 3         | -        | -         | -        | -         | -         | -        | -        | -        | 0         | 3         |
| Instrumentation removal    | -         | -         | -        | -         | -        | -         | 1         | 1        | -        | -        | 1         | 1         |
| Dural tear                 | 1         | -         | -        | -         | -        | -         | -         | -        | -        | -        | 1         | 0         |
|                            | <b>21</b> | <b>41</b> | <b>8</b> | <b>15</b> | <b>9</b> | <b>14</b> | <b>11</b> | <b>7</b> | <b>4</b> | <b>5</b> | <b>53</b> | <b>82</b> |

**eTable 5.** Serious Adverse Events through 5 Years.<sup>a</sup>

| Group                                       | Device     |            |              | Control    |            |              | Significance |             |
|---------------------------------------------|------------|------------|--------------|------------|------------|--------------|--------------|-------------|
|                                             | Events     | Subjects   | %            | Events     | Subjects   | %            | Difference   | P           |
| <b>ANY SERIOUS ADVERSE EVENT</b>            | <b>209</b> | <b>115</b> | <b>43.1%</b> | <b>237</b> | <b>132</b> | <b>46.6%</b> | <b>-3.6%</b> | <b>.440</b> |
| <b>Benign soft tissue masses/tumors</b>     | 2          | 2          | 0.7%         | 2          | 2          | 0.7%         | 0.0%         | > .99       |
| <b>Cancer</b>                               | 5          | 5          | 1.9%         | 4          | 3          | 1.1%         | 0.8%         | .493        |
| <b>Cardiac and Vascular</b>                 | 20         | 18         | 6.7%         | 10         | 10         | 3.5%         | 3.2%         | .119        |
| <i>Bleeding</i>                             | 0          | 0          | 0.0%         | 0          | 0          | 0.0%         |              |             |
| <i>Other</i>                                | 20         | 18         | 6.7%         | 10         | 10         | 3.5%         |              |             |
| <b>Death</b>                                | 1          | 1          | 0.4%         | 1          | 1          | 0.4%         | 0.0%         | > .99       |
| <b>Dermatologic</b>                         | 0          | 0          | 0.0%         | 1          | 1          | 0.4%         | -0.4%        | > .99       |
| <b>Device Deficiency</b>                    | 12         | 12         | 4.5%         | 0          | 0          | 0.0%         | 4.5%         | < .001      |
| <i>Anchor (whole device) migration</i>      | 3          | 3          | 1.1%         | 0          | 0          | 0.0%         |              |             |
| <i>Mesh Migration - Extradiscal</i>         | 4          | 4          | 1.5%         | 0          | 0          | 0.0%         |              |             |
| <i>Mesh Migration - Intradiscal</i>         | 1          | 1          | 0.4%         | 0          | 0          | 0.0%         |              |             |
| <i>Mesh Subsidence - no Detachment</i>      | 0          | 0          | 0.0%         | 0          | 0          | 0.0%         |              |             |
| <i>Mesh Subsidence - with Detachment</i>    | 0          | 0          | 0.0%         | 0          | 0          | 0.0%         |              |             |
| <i>Mesh Detachment - Extradiscal</i>        | 2          | 2          | 0.7%         | 0          | 0          | 0.0%         |              |             |
| <i>Mesh Detachment - Intradiscal</i>        | 1          | 1          | 0.4%         | 0          | 0          | 0.0%         |              |             |
| <i>Anchor Fracture</i>                      | 1          | 1          | 0.4%         | 0          | 0          | 0.0%         |              |             |
| <i>Other</i>                                | 0          | 0          | 0.0%         | 0          | 0          | 0.0%         |              |             |
| <b>Disc Herniation</b>                      | 37         | 31         | 11.6%        | 75         | 59         | 20.8%        | -9.2%        | .004        |
| <i>Herniation - Index Level</i>             | 23         | 20         | 7.5%         | 67         | 55         | 19.4%        |              |             |
| <i>Residual herniation - Index Level</i>    | 2          | 2          | 0.7%         | 0          | 0          | 0.0%         |              |             |
| <i>Disc Herniation - Adjacent Level</i>     | 5          | 4          | 1.5%         | 7          | 6          | 2.1%         |              |             |
| <i>Disc Herniation - Non-Adjacent Level</i> | 7          | 6          | 2.2%         | 1          | 1          | 0.4%         |              |             |
| <b>Endocrine</b>                            | 4          | 4          | 1.5%         | 1          | 1          | 0.4%         | 1.1%         | .204        |
| <b>Eyes/Ears/Nose/Throat (EENT)</b>         | 3          | 3          | 1.1%         | 10         | 10         | 3.5%         | -2.4%        | .090        |
| <b>Gastrointestinal</b>                     | 16         | 12         | 4.5%         | 20         | 18         | 6.4%         | -1.9%        | .354        |
| <b>Genitourinary</b>                        | 8          | 8          | 3.0%         | 10         | 9          | 3.2%         | -0.2%        | > .99       |
| <b>OB/GYN</b>                               | 9          | 7          | 2.6%         | 7          | 7          | 2.5%         | 0.1%         | > .99       |



|                                                               |    |    |      |    |    |      |       |       |
|---------------------------------------------------------------|----|----|------|----|----|------|-------|-------|
| <b>Infectious Disease</b>                                     | 3  | 3  | 1.1% | 4  | 4  | 1.4% | -0.3% | > .99 |
| <b>Immunological</b>                                          | 1  | 1  | 0.4% | 1  | 1  | 0.4% | 0.0%  | > .99 |
| <b>Metabolic/Hematologic/Electrolytes</b>                     | 0  | 0  | 0.0% | 1  | 1  | 0.4% | -0.4% | > .99 |
| <b>Musculoskeletal - Lumbar</b>                               | 6  | 5  | 1.9% | 5  | 5  | 1.8% | 0.1%  | > .99 |
| <i>Spinal Instability</i>                                     | 1  | 1  | 0.4% | 0  | 0  | 0.0% |       |       |
| <i>Scoliosis</i>                                              | 0  | 0  | 0.0% | 0  | 0  | 0.0% |       |       |
| <i>Radiographic Finding</i>                                   | 0  | 0  | 0.0% | 0  | 0  | 0.0% |       |       |
| <i>Facet Syndrome</i>                                         | 4  | 3  | 1.1% | 2  | 2  | 0.7% |       |       |
| <i>Other</i>                                                  | 1  | 1  | 0.4% | 3  | 3  | 1.1% |       |       |
| <b>Musculoskeletal - Non-Lumbar</b>                           | 23 | 20 | 7.5% | 20 | 16 | 5.7% | 1.8%  | .395  |
| <b>Neurological - Lumbar and Lower Extremity</b>              | 2  | 2  | 0.7% | 4  | 4  | 1.4% | -0.7% | .687  |
| <i>Nerve or Spinal Root Injury: Index Surgery</i>             | 0  | 0  | 0.0% | 1  | 1  | 0.4% |       |       |
| <i>Nerve Root or Spinal cord Impingement</i>                  | 1  | 1  | 0.4% | 0  | 0  | 0.0% |       |       |
| <i>Musculoskeletal Spasms of the Back or Legs</i>             | 1  | 1  | 0.4% | 1  | 1  | 0.4% |       |       |
| <i>Neurological Deterioration</i>                             | 0  | 0  | 0.0% | 2  | 2  | 0.7% |       |       |
| <i>Other</i>                                                  | 0  | 0  | 0.0% | 0  | 0  | 0.0% |       |       |
| <b>Neurological - Non-Lumbar/Lower Extremity</b>              | 10 | 9  | 3.4% | 11 | 9  | 3.2% | 0.2%  | > .99 |
| <b>Pain - Lumbar and Lower Extremity</b>                      | 26 | 20 | 7.5% | 21 | 15 | 5.3% | 2.2%  | .301  |
| <i>Lower Extremity Only</i>                                   | 8  | 8  | 3.0% | 5  | 4  | 1.4% |       |       |
| <i>Lumbar</i>                                                 | 10 | 10 | 3.7% | 8  | 7  | 2.5% |       |       |
| <i>Lumbar and Lower Extremity</i>                             | 8  | 7  | 2.6% | 8  | 5  | 1.8% |       |       |
| <i>Non-specific</i>                                           | 0  | 0  | 0.0% | 0  | 0  | 0.0% |       |       |
| <b>Psychological</b>                                          | 4  | 4  | 1.5% | 5  | 5  | 1.8% | -0.3% | > .99 |
| <b>Respiratory/Pulmonary</b>                                  | 2  | 2  | 0.7% | 7  | 7  | 2.5% | -1.7% | .178  |
| <b>Trauma</b>                                                 | 12 | 11 | 4.1% | 8  | 8  | 2.8% | 1.3%  | .487  |
| <b>Wound Issue- Index or Secondary Surgery at Index Level</b> | 3  | 3  | 1.1% | 9  | 7  | 2.5% | -1.3% | .341  |

|                                       |   |   |      |   |   |      |      |   |
|---------------------------------------|---|---|------|---|---|------|------|---|
| <i>Dural Injury/Tear or CSF Leak</i>  | 1 | 1 | 0.4% | 2 | 2 | 0.7% |      |   |
| <i>Infection</i>                      | 1 | 1 | 0.4% | 3 | 2 | 0.7% |      |   |
| <i>Hematoma</i>                       | 0 | 0 | 0.0% | 1 | 1 | 0.4% |      |   |
| <i>Delayed Wound Healing</i>          | 1 | 1 | 0.4% | 0 | 0 | 0.0% |      |   |
| <i>Dehiscence</i>                     | 0 | 0 | 0.0% | 1 | 1 | 0.4% |      |   |
| <i>Deep</i>                           | 0 | 0 | 0.0% | 2 | 2 | 0.7% |      |   |
| <b>Necrosis of Bone or Resorption</b> | 0 | 0 | 0.0% | 0 | 0 | 0.0% | 0.0% | — |

<sup>a</sup> Adverse events reported in the as-treated population consisting of 267 patients receiving ACD and 283 receiving Control. In the as-treated population, failed implantation in 5 ACD patients (including 1 with nerve root injury) resulted in assignment to the Control group.

**eTable 6.** Serious Device- and Procedure-related Adverse Events through 5 Years.<sup>a</sup>

| Group                                                        | Device    |           |              | Control   |           |              | Significance |             |
|--------------------------------------------------------------|-----------|-----------|--------------|-----------|-----------|--------------|--------------|-------------|
|                                                              | Events    | Subjects  | %            | Events    | Subjects  | %            | Difference   | P           |
| <b>ANY DEVICE OR PROCEDURE RELATED SERIOUS ADVERSE EVENT</b> | <b>41</b> | <b>32</b> | <b>12.0%</b> | <b>80</b> | <b>58</b> | <b>20.5%</b> | <b>-8.5%</b> | <b>.008</b> |
| <b>Benign soft tissue masses/tumors</b>                      | 0         | 0         | 0.0%         | 0         | 0         | 0.0%         | 0.0%         | —           |
| <b>Cancer</b>                                                | 0         | 0         | 0.0%         | 0         | 0         | 0.0%         | 0.0%         | —           |
| <b>Cardiac and Vascular</b>                                  | 0         | 0         | 0.0%         | 2         | 2         | 0.7%         | -0.7%        | .500        |
| <i>Bleeding</i>                                              | 0         | 0         | 0.0%         | 0         | 0         | 0.0%         |              |             |
| <i>Other</i>                                                 | 0         | 0         | 0.0%         | 2         | 2         | 0.7%         |              |             |
| <b>Death</b>                                                 | 0         | 0         | 0.0%         | 0         | 0         | 0.0%         | 0.0%         | —           |
| <b>Dermatologic</b>                                          | 0         | 0         | 0.0%         | 0         | 0         | 0.0%         | 0.0%         | —           |
| <b>Device Deficiency</b>                                     | 11        | 11        | 4.1%         | 0         | 0         | 0.0%         | 4.1%         | < .001      |
| <i>Anchor (whole device) migration</i>                       | 2         | 2         | 0.7%         | 0         | 0         | 0.0%         |              |             |
| <i>Mesh Migration - Extradiscal</i>                          | 4         | 4         | 1.5%         | 0         | 0         | 0.0%         |              |             |
| <i>Mesh Migration - Intradiscal</i>                          | 1         | 1         | 0.4%         | 0         | 0         | 0.0%         |              |             |
| <i>Mesh Subsidence - no Detachment</i>                       | 0         | 0         | 0.0%         | 0         | 0         | 0.0%         |              |             |
| <i>Mesh Subsidence - with Detachment</i>                     | 0         | 0         | 0.0%         | 0         | 0         | 0.0%         |              |             |
| <i>Mesh Detachment - Extradiscal</i>                         | 2         | 2         | 0.7%         | 0         | 0         | 0.0%         |              |             |
| <i>Mesh Detachment - Intradiscal</i>                         | 1         | 1         | 0.4%         | 0         | 0         | 0.0%         |              |             |
| <i>Anchor Fracture</i>                                       | 1         | 1         | 0.4%         | 0         | 0         | 0.0%         |              |             |
| <i>Other</i>                                                 | 0         | 0         | 0.0%         | 0         | 0         | 0.0%         |              |             |
| <b>Disc Herniation</b>                                       | 24        | 21        | 7.9%         | 60        | 49        | 17.3%        | -9.4%        | .001        |
| <i>Herniation - Index Level</i>                              | 21        | 18        | 6.7%         | 60        | 49        | 17.3%        |              |             |
| <i>Residual herniation - Index Level</i>                     | 2         | 2         | 0.7%         | 0         | 0         | 0.0%         |              |             |
| <i>Disc Herniation - Adjacent Level</i>                      | 1         | 1         | 0.4%         | 0         | 0         | 0.0%         |              |             |
| <i>Disc Herniation - Non-Adjacent Level</i>                  | 0         | 0         | 0.0%         | 0         | 0         | 0.0%         |              |             |
| <b>Endocrine</b>                                             | 0         | 0         | 0.0%         | 0         | 0         | 0.0%         | 0.0%         | —           |
| <b>Eyes/Ears/Nose/Throat (EENT)</b>                          | 0         | 0         | 0.0%         | 0         | 0         | 0.0%         | 0.0%         | —           |
| <b>Gastrointestinal</b>                                      | 0         | 0         | 0.0%         | 1         | 1         | 0.4%         | -0.4%        | > .99       |

|                                                   |   |   |      |   |   |      |       |       |
|---------------------------------------------------|---|---|------|---|---|------|-------|-------|
| <b>Genitourinary</b>                              | 0 | 0 | 0.0% | 0 | 0 | 0.0% | 0.0%  | —     |
| <b>OB/GYN</b>                                     | 0 | 0 | 0.0% | 0 | 0 | 0.0% | 0.0%  | —     |
| <b>Infectious Disease</b>                         | 0 | 0 | 0.0% | 0 | 0 | 0.0% | 0.0%  | —     |
| <b>Immunological</b>                              | 0 | 0 | 0.0% | 0 | 0 | 0.0% | 0.0%  | —     |
| <b>Metabolic/Hematologic/Electrolytes</b>         | 0 | 0 | 0.0% | 0 | 0 | 0.0% | 0.0%  | —     |
| <b>Musculoskeletal - Lumbar</b>                   | 0 | 0 | 0.0% | 1 | 1 | 0.4% | -0.4% | > .99 |
| <i>Spinal Instability</i>                         | 0 | 0 | 0.0% | 0 | 0 | 0.0% |       |       |
| <i>Scoliosis</i>                                  | 0 | 0 | 0.0% | 0 | 0 | 0.0% |       |       |
| <i>Radiographic Finding</i>                       | 0 | 0 | 0.0% | 0 | 0 | 0.0% |       |       |
| <i>Facet Syndrome</i>                             | 0 | 0 | 0.0% | 0 | 0 | 0.0% |       |       |
| <i>Other</i>                                      | 0 | 0 | 0.0% | 1 | 1 | 0.4% |       |       |
| <b>Musculoskeletal - Non-Lumbar</b>               | 0 | 0 | 0.0% | 0 | 0 | 0.0% | 0.0%  | —     |
| <b>Neurological - Lumbar and Lower Extremity</b>  | 0 | 0 | 0.0% | 2 | 2 | 0.7% | -0.7% | .500  |
| <i>Nerve or Spinal Root Injury: Index Surgery</i> | 0 | 0 | 0.0% | 1 | 1 | 0.4% |       |       |
| <i>Nerve Root or Spinal cord Impingement</i>      | 0 | 0 | 0.0% | 0 | 0 | 0.0% |       |       |
| <i>Musculoskeletal Spasms of the Back or Legs</i> | 0 | 0 | 0.0% | 0 | 0 | 0.0% |       |       |
| <i>Neurological Deterioration</i>                 | 0 | 0 | 0.0% | 1 | 1 | 0.4% |       |       |
| <i>Other</i>                                      | 0 | 0 | 0.0% | 0 | 0 | 0.0% |       |       |
| <b>Neurological - Non-Lumbar/Lower Extremity</b>  | 0 | 0 | 0.0% | 0 | 0 | 0.0% | 0.0%  | —     |
| <b>Pain - Lumbar and Lower Extremity</b>          | 3 | 3 | 1.1% | 5 | 3 | 1.1% | 0.1%  | > .99 |
| <i>Lower Extremity Only</i>                       | 1 | 1 | 0.4% | 4 | 3 | 1.1% |       |       |
| <i>Lumbar</i>                                     | 1 | 1 | 0.4% | 0 | 0 | 0.0% |       |       |
| <i>Lumbar and Lower Extremity</i>                 | 1 | 1 | 0.4% | 1 | 1 | 0.4% |       |       |
| <i>Non-specific</i>                               | 0 | 0 | 0.0% | 0 | 0 | 0.0% |       |       |
| <b>Psychological</b>                              | 0 | 0 | 0.0% | 0 | 0 | 0.0% | 0.0%  | —     |
| <b>Respiratory/Pulmonary</b>                      | 0 | 0 | 0.0% | 0 | 0 | 0.0% | 0.0%  | —     |
| <b>Trauma</b>                                     | 0 | 0 | 0.0% | 0 | 0 | 0.0% | 0.0%  | —     |

|                                                               |   |   |      |   |   |      |       |      |
|---------------------------------------------------------------|---|---|------|---|---|------|-------|------|
| <b>Wound Issue- Index or Secondary Surgery at Index Level</b> | 3 | 3 | 1.1% | 9 | 7 | 2.5% | -1.3% | .341 |
| <i>Dural Injury/Tear or CSF Leak</i>                          | 1 | 1 | 0.4% | 2 | 2 | 0.7% |       |      |
| <i>Infection</i>                                              | 1 | 1 | 0.4% | 3 | 2 | 0.7% |       |      |
| <i>Hematoma</i>                                               | 0 | 0 | 0.0% | 1 | 1 | 0.4% |       |      |
| <i>Delayed Wound Healing</i>                                  | 1 | 1 | 0.4% | 0 | 0 | 0.0% |       |      |
| <i>Dehiscence</i>                                             | 0 | 0 | 0.0% | 1 | 1 | 0.4% |       |      |
| <i>Deep</i>                                                   | 0 | 0 | 0.0% | 2 | 2 | 0.7% |       |      |
| <b>Necrosis of Bone or Resorption</b>                         | 0 | 0 | 0.0% | 0 | 0 | 0.0% | 0.0%  | —    |

<sup>a</sup> Adverse events reported in the as-treated population consisting of 267 patients receiving ACD and 283 receiving Control. In the as-treated population, failed implantation in 5 ACD patients (including 1 with nerve root injury) resulted in assignment to the Control group.

eTable 7. All Adverse Events through 5 Years.<sup>a</sup>

| Group                                       | Device     |            |              | Control    |            |              | Significance |             |
|---------------------------------------------|------------|------------|--------------|------------|------------|--------------|--------------|-------------|
|                                             | Events     | Subjects   | %            | Events     | Subjects   | %            | Difference   | P           |
| <b>ANY ADVERSE EVENT</b>                    | <b>680</b> | <b>228</b> | <b>85.4%</b> | <b>662</b> | <b>232</b> | <b>82.0%</b> | <b>3.4%</b>  | <b>.301</b> |
| <b>Benign soft tissue masses/tumors</b>     | 3          | 3          | 1.1%         | 2          | 2          | 0.7%         | 0.4%         | .678        |
| <b>Cancer</b>                               | 8          | 8          | 3.0%         | 5          | 4          | 1.4%         | 1.6%         | .250        |
| <b>Cardiac and Vascular</b>                 | 27         | 24         | 9.0%         | 25         | 23         | 8.1%         | 0.9%         | .762        |
| <i>Bleeding</i>                             | 2          | 2          | 0.7%         | 0          | 0          | 0.0%         |              |             |
| <i>Other</i>                                | 25         | 22         | 8.2%         | 25         | 23         | 8.1%         |              |             |
| <b>Death</b>                                | 1          | 1          | 0.4%         | 1          | 1          | 0.4%         | 0.0%         | > .99       |
| <b>Dermatologic</b>                         | 3          | 3          | 1.1%         | 5          | 5          | 1.8%         | -0.6%        | .725        |
| <b>Device Deficiency</b>                    | 34         | 33         | 12.4%        | 1          | 1          | 0.4%         | 12.0%        | < .001      |
| <i>Anchor (whole device) migration</i>      | 3          | 3          | 1.1%         | 0          | 0          | 0.0%         |              |             |
| <i>Mesh Migration - Extradiscal</i>         | 8          | 8          | 3.0%         | 0          | 0          | 0.0%         |              |             |
| <i>Mesh Migration - Intradiscal</i>         | 4          | 4          | 1.5%         | 0          | 0          | 0.0%         |              |             |
| <i>Mesh Subsidence - no Detachment</i>      | 4          | 4          | 1.5%         | 0          | 0          | 0.0%         |              |             |
| <i>Mesh Subsidence - with Detachment</i>    | 3          | 3          | 1.1%         | 0          | 0          | 0.0%         |              |             |
| <i>Mesh Detachment - Extradiscal</i>        | 7          | 7          | 2.6%         | 0          | 0          | 0.0%         |              |             |
| <i>Mesh Detachment - Intradiscal</i>        | 2          | 2          | 0.7%         | 1          | 1          | 0.4%         |              |             |
| <i>Anchor Fracture</i>                      | 2          | 2          | 0.7%         | 0          | 0          | 0.0%         |              |             |
| <i>Other</i>                                | 1          | 1          | 0.4%         | 0          | 0          | 0.0%         |              |             |
| <b>Disc Herniation</b>                      | 69         | 55         | 20.6%        | 122        | 93         | 32.9%        | -12.3%       | .001        |
| <i>Herniation - Index Level</i>             | 38         | 34         | 12.7%        | 102        | 85         | 30.0%        |              |             |
| <i>Residual herniation - Index Level</i>    | 2          | 2          | 0.7%         | 0          | 0          | 0.0%         |              |             |
| <i>Disc Herniation - Adjacent Level</i>     | 19         | 17         | 6.4%         | 16         | 14         | 4.9%         |              |             |
| <i>Disc Herniation - Non-Adjacent Level</i> | 10         | 9          | 3.4%         | 4          | 4          | 1.4%         |              |             |
| <b>Endocrine</b>                            | 8          | 8          | 3.0%         | 4          | 4          | 1.4%         | 1.6%         | .250        |
| <b>Eyes/Ears/Nose/Throat (EENT)</b>         | 13         | 13         | 4.9%         | 23         | 23         | 8.1%         | -3.3%        | .167        |
| <b>Gastrointestinal</b>                     | 28         | 22         | 8.2%         | 40         | 32         | 11.3%        | -3.1%        | .253        |
| <b>Genitourinary</b>                        | 18         | 18         | 6.7%         | 17         | 15         | 5.3%         | 1.4%         | .591        |
| <b>OB/GYN</b>                               | 12         | 10         | 3.7%         | 9          | 9          | 3.2%         | 0.6%         | .817        |

|                                                               |     |    |       |     |     |       |       |       |
|---------------------------------------------------------------|-----|----|-------|-----|-----|-------|-------|-------|
| <b>Infectious Disease</b>                                     | 5   | 4  | 1.5%  | 4   | 4   | 1.4%  | 0.1%  | > .99 |
| <b>Immunological</b>                                          | 3   | 3  | 1.1%  | 7   | 7   | 2.5%  | -1.3% | .341  |
| <b>Metabolic/Hematologic/Electrolytes</b>                     | 4   | 4  | 1.5%  | 8   | 8   | 2.8%  | -1.3% | .385  |
| <b>Musculoskeletal - Lumbar</b>                               | 17  | 15 | 5.6%  | 17  | 14  | 4.9%  | 0.7%  | .849  |
| <i>Spinal Instability</i>                                     | 2   | 2  | 0.7%  | 0   | 0   | 0.0%  |       |       |
| <i>Scoliosis</i>                                              | 0   | 0  | 0.0%  | 3   | 3   | 1.1%  |       |       |
| <i>Radiographic Finding</i>                                   | 4   | 4  | 1.5%  | 0   | 0   | 0.0%  |       |       |
| <i>Facet Syndrome</i>                                         | 10  | 9  | 3.4%  | 9   | 7   | 2.5%  |       |       |
| <i>Other</i>                                                  | 1   | 1  | 0.4%  | 5   | 5   | 1.8%  |       |       |
| <b>Musculoskeletal - Non-Lumbar</b>                           | 89  | 66 | 24.7% | 84  | 64  | 22.6% | 2.1%  | .616  |
| <b>Neurological - Lumbar and Lower Extremity</b>              | 44  | 37 | 13.9% | 33  | 30  | 10.6% | 3.3%  | .297  |
| <i>Nerve or Spinal Root Injury: Index Surgery</i>             | 2   | 2  | 0.7%  | 4   | 4   | 1.4%  |       |       |
| <i>Nerve Root or Spinal cord Impingement</i>                  | 4   | 4  | 1.5%  | 3   | 2   | 0.7%  |       |       |
| <i>Muskuloskeletal Spasms of the Back or Legs</i>             | 9   | 9  | 3.4%  | 1   | 1   | 0.4%  |       |       |
| <i>Neurological Deterioration</i>                             | 28  | 23 | 8.6%  | 25  | 23  | 8.1%  |       |       |
| <i>Other</i>                                                  | 1   | 1  | 0.4%  | 0   | 0   | 0.0%  |       |       |
| <b>Neurological - Non-Lumbar/Lower Extremity</b>              | 24  | 19 | 7.1%  | 20  | 15  | 5.3%  | 1.8%  | .383  |
| <b>Pain - Lumbar and Lower Extremity</b>                      | 139 | 97 | 36.3% | 148 | 111 | 39.2% | -2.9% | .538  |
| <i>Lower Extremity Only</i>                                   | 41  | 37 | 13.9% | 53  | 46  | 16.3% |       |       |
| <i>Lumbar</i>                                                 | 68  | 59 | 22.1% | 75  | 65  | 23.0% |       |       |
| <i>Lumbar and Lower Extremity</i>                             | 29  | 26 | 9.7%  | 20  | 16  | 5.7%  |       |       |
| <i>Non-specific</i>                                           | 1   | 1  | 0.4%  | 0   | 0   | 0.0%  |       |       |
| <b>Psychological</b>                                          | 15  | 15 | 5.6%  | 15  | 15  | 5.3%  | 0.3%  | > .99 |
| <b>Respiratory/Pulmonary</b>                                  | 6   | 6  | 2.2%  | 17  | 17  | 6.0%  | -3.8% | .033  |
| <b>Trauma</b>                                                 | 27  | 26 | 9.7%  | 26  | 24  | 8.5%  | 1.3%  | .658  |
| <b>Wound Issue- Index or Secondary Surgery at Index Level</b> | 26  | 22 | 8.2%  | 25  | 22  | 7.8%  | 0.5%  | .876  |

|                                       |    |    |       |    |    |      |       |        |
|---------------------------------------|----|----|-------|----|----|------|-------|--------|
| <i>Dural Injury/Tear or CSF Leak</i>  | 19 | 18 | 6.7%  | 15 | 15 | 5.3% |       |        |
| <i>Infection</i>                      | 2  | 2  | 0.7%  | 5  | 4  | 1.4% |       |        |
| <i>Hematoma</i>                       | 3  | 3  | 1.1%  | 2  | 2  | 0.7% |       |        |
| <i>Delayed Wound Healing</i>          | 1  | 1  | 0.4%  | 0  | 0  | 0.0% |       |        |
| <i>Dehiscence</i>                     | 0  | 0  | 0.0%  | 1  | 1  | 0.4% |       |        |
| <i>Deep</i>                           | 1  | 1  | 0.4%  | 2  | 2  | 0.7% |       |        |
| <b>Necrosis of Bone or Resorption</b> | 57 | 54 | 20.2% | 4  | 4  | 1.4% | 18.8% | < .001 |

<sup>a</sup> Adverse events reported in the as-treated population consisting of 267 patients receiving ACD and 283 receiving Control. In the as-treated population, failed implantation in 5 ACD patients (including 1 with nerve root injury) resulted in assignment to the Control group.



**eTable 8.** All Device- and Procedure-related Adverse Events through 5 Years.<sup>a</sup>

| Group                                                | Device     |            |              | Control    |            |              | Significance |             |
|------------------------------------------------------|------------|------------|--------------|------------|------------|--------------|--------------|-------------|
|                                                      | Events     | Subjects   | %            | Events     | Subjects   | %            | Difference   | P           |
| <b>ANY DEVICE OR PROCEDURE RELATED ADVERSE EVENT</b> | <b>168</b> | <b>121</b> | <b>45.3%</b> | <b>146</b> | <b>105</b> | <b>37.1%</b> | <b>8.2%</b>  | <b>.057</b> |
| <b>Benign soft tissue masses/tumors</b>              | 0          | 0          | 0.0%         | 0          | 0          | 0.0%         | 0.0%         | —           |
| <b>Cancer</b>                                        | 0          | 0          | 0.0%         | 0          | 0          | 0.0%         | 0.0%         | —           |
| <b>Cardiac and Vascular</b>                          | 2          | 2          | 0.7%         | 4          | 4          | 1.4%         | -0.7%        | .687        |
| <i>Bleeding</i>                                      | 2          | 2          | 0.7%         | 0          | 0          | 0.0%         |              |             |
| <i>Other</i>                                         | 0          | 0          | 0.0%         | 4          | 4          | 1.4%         |              |             |
| <b>Death</b>                                         | 0          | 0          | 0.0%         | 0          | 0          | 0.0%         | 0.0%         | —           |
| <b>Dermatologic</b>                                  | 0          | 0          | 0.0%         | 1          | 1          | 0.4%         | -0.4%        | > .99       |
| <b>Device Deficiency</b>                             | 33         | 32         | 12.0%        | 1          | 1          | 0.4%         | 11.6%        | < .001      |
| <i>Anchor (whole device) migration</i>               | 2          | 2          | 0.7%         | 0          | 0          | 0.0%         |              |             |
| <i>Mesh Migration - Extradiscal</i>                  | 8          | 8          | 3.0%         | 0          | 0          | 0.0%         |              |             |
| <i>Mesh Migration - Intradiscal</i>                  | 4          | 4          | 1.5%         | 0          | 0          | 0.0%         |              |             |
| <i>Mesh Subsidence - no Detachment</i>               | 4          | 4          | 1.5%         | 0          | 0          | 0.0%         |              |             |
| <i>Mesh Subsidence - with Detachment</i>             | 3          | 3          | 1.1%         | 0          | 0          | 0.0%         |              |             |
| <i>Mesh Detachment - Extradiscal</i>                 | 7          | 7          | 2.6%         | 0          | 0          | 0.0%         |              |             |
| <i>Mesh Detachment - Intradiscal</i>                 | 2          | 2          | 0.7%         | 1          | 1          | 0.4%         |              |             |
| <i>Anchor Fracture</i>                               | 2          | 2          | 0.7%         | 0          | 0          | 0.0%         |              |             |
| <i>Other</i>                                         | 1          | 1          | 0.4%         | 0          | 0          | 0.0%         |              |             |
| <b>Disc Herniation</b>                               | 38         | 34         | 12.7%        | 91         | 77         | 27.2%        | -14.5%       | < .001      |
| <i>Herniation - Index Level</i>                      | 35         | 31         | 11.6%        | 91         | 77         | 27.2%        |              |             |
| <i>Residual herniation - Index Level</i>             | 2          | 2          | 0.7%         | 0          | 0          | 0.0%         |              |             |
| <i>Disc Herniation - Adjacent Level</i>              | 1          | 1          | 0.4%         | 0          | 0          | 0.0%         |              |             |
| <i>Disc Herniation - Non-Adjacent Level</i>          | 0          | 0          | 0.0%         | 0          | 0          | 0.0%         |              |             |
| <b>Endocrine</b>                                     | 0          | 0          | 0.0%         | 0          | 0          | 0.0%         | 0.0%         | —           |
| <b>Eyes/Ears/Nose/Throat (EENT)</b>                  | 0          | 0          | 0.0%         | 0          | 0          | 0.0%         | 0.0%         | —           |
| <b>Gastrointestinal</b>                              | 1          | 1          | 0.4%         | 3          | 3          | 1.1%         | -0.7%        | .624        |
| <b>Genitourinary</b>                                 | 1          | 1          | 0.4%         | 1          | 1          | 0.4%         | 0.0%         | > .99       |

|                                                   |   |   |      |   |   |      |       |       |
|---------------------------------------------------|---|---|------|---|---|------|-------|-------|
| <b>OB/GYN</b>                                     | 0 | 0 | 0.0% | 0 | 0 | 0.0% | 0.0%  | —     |
| <b>Infectious Disease</b>                         | 0 | 0 | 0.0% | 0 | 0 | 0.0% | 0.0%  | —     |
| <b>Immunological</b>                              | 0 | 0 | 0.0% | 1 | 1 | 0.4% | -0.4% | > .99 |
| <b>Metabolic/Hematologic/Electrolytes</b>         | 0 | 0 | 0.0% | 1 | 1 | 0.4% | -0.4% | > .99 |
| <b>Musculoskeletal - Lumbar</b>                   | 1 | 1 | 0.4% | 1 | 1 | 0.4% | 0.0%  | > .99 |
| <i>Spinal Instability</i>                         | 0 | 0 | 0.0% | 0 | 0 | 0.0% |       |       |
| <i>Scoliosis</i>                                  | 0 | 0 | 0.0% | 0 | 0 | 0.0% |       |       |
| <i>Radiographic Finding</i>                       | 1 | 1 | 0.4% | 0 | 0 | 0.0% |       |       |
| <i>Facet Syndrome</i>                             | 0 | 0 | 0.0% | 0 | 0 | 0.0% |       |       |
| <i>Other</i>                                      | 0 | 0 | 0.0% | 1 | 1 | 0.4% |       |       |
| <b>Musculoskeletal - Non-Lumbar</b>               | 0 | 0 | 0.0% | 0 | 0 | 0.0% | 0.0%  | —     |
| <b>Neurological - Lumbar and Lower Extremity</b>  | 3 | 3 | 1.1% | 9 | 9 | 3.2% | -2.1% | .144  |
| <i>Nerve or Spinal Root Injury: Index Surgery</i> | 2 | 2 | 0.7% | 4 | 4 | 1.4% |       |       |
| <i>Nerve Root or Spinal cord Impingement</i>      | 0 | 0 | 0.0% | 0 | 0 | 0.0% |       |       |
| <i>Muskuloskeletal Spasms of the Back or Legs</i> | 0 | 0 | 0.0% | 0 | 0 | 0.0% |       |       |
| <i>Neurological Deterioration</i>                 | 1 | 1 | 0.4% | 5 | 5 | 1.8% |       |       |
| <i>Other</i>                                      | 0 | 0 | 0.0% | 0 | 0 | 0.0% |       |       |
| <b>Neurological - Non-Lumbar/Lower Extremity</b>  | 0 | 0 | 0.0% | 0 | 0 | 0.0% | 0.0%  | —     |
| <b>Pain - Lumbar and Lower Extremity</b>          | 9 | 9 | 3.4% | 8 | 6 | 2.1% | 1.3%  | .438  |
| <i>Lower Extremity Only</i>                       | 3 | 3 | 1.1% | 6 | 5 | 1.8% |       |       |
| <i>Lumbar</i>                                     | 3 | 3 | 1.1% | 1 | 1 | 0.4% |       |       |
| <i>Lumbar and Lower Extremity</i>                 | 2 | 2 | 0.7% | 1 | 1 | 0.4% |       |       |
| <i>Non-specific</i>                               | 1 | 1 | 0.4% | 0 | 0 | 0.0% |       |       |
| <b>Psychological</b>                              | 0 | 0 | 0.0% | 0 | 0 | 0.0% | 0.0%  | —     |
| <b>Respiratory/Pulmonary</b>                      | 0 | 0 | 0.0% | 0 | 0 | 0.0% | 0.0%  | —     |
| <b>Trauma</b>                                     | 0 | 0 | 0.0% | 1 | 1 | 0.4% | -0.4% | > .99 |

|                                                               |    |    |       |    |    |      |       |        |
|---------------------------------------------------------------|----|----|-------|----|----|------|-------|--------|
| <b>Wound Issue- Index or Secondary Surgery at Index Level</b> | 25 | 22 | 8.2%  | 23 | 21 | 7.4% | 0.8%  | .753   |
| <i>Dural Injury/Tear or CSF Leak</i>                          | 18 | 18 | 6.7%  | 14 | 14 | 4.9% |       |        |
| <i>Infection</i>                                              | 2  | 2  | 0.7%  | 4  | 3  | 1.1% |       |        |
| <i>Hematoma</i>                                               | 3  | 3  | 1.1%  | 2  | 2  | 0.7% |       |        |
| <i>Delayed Wound Healing</i>                                  | 1  | 1  | 0.4%  | 0  | 0  | 0.0% |       |        |
| <i>Dehiscence</i>                                             | 0  | 0  | 0.0%  | 1  | 1  | 0.4% |       |        |
| <i>Deep</i>                                                   | 1  | 1  | 0.4%  | 2  | 2  | 0.7% |       |        |
| <b>Necrosis of Bone or Resorption</b>                         | 55 | 53 | 19.9% | 1  | 1  | 0.4% | 19.5% | < .001 |

<sup>a</sup> Adverse events reported in the as-treated population consisting of 267 patients receiving ACD and 283 receiving Control. In the as-treated population, failed implantation in 5 ACD patients (including 1 with nerve root injury) resulted in assignment to the Control group.

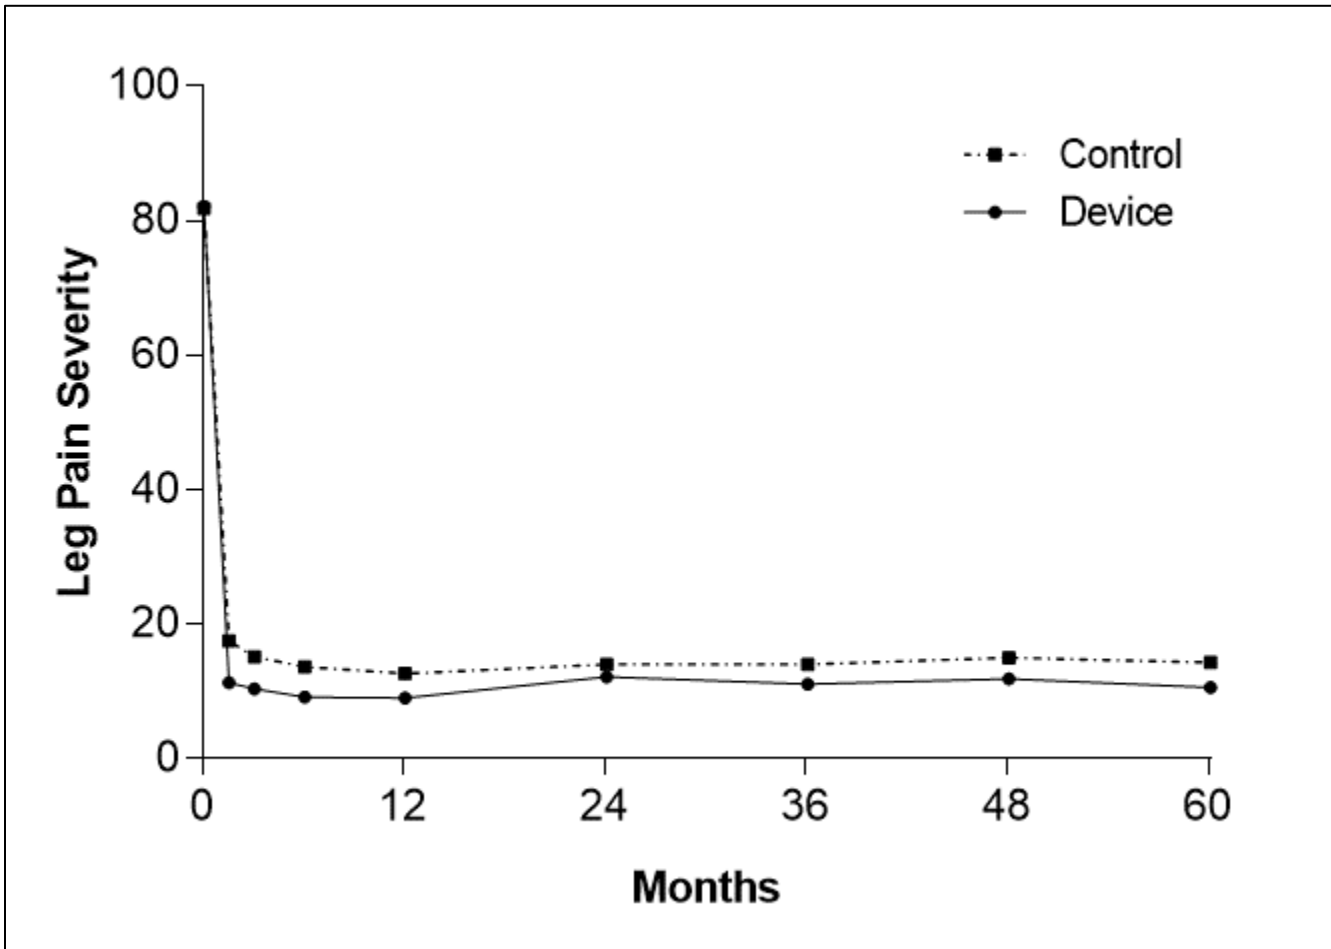

**eFigure 1.** Visual analogue Scale for Leg Pain Severity over 5 Years Follow-up.

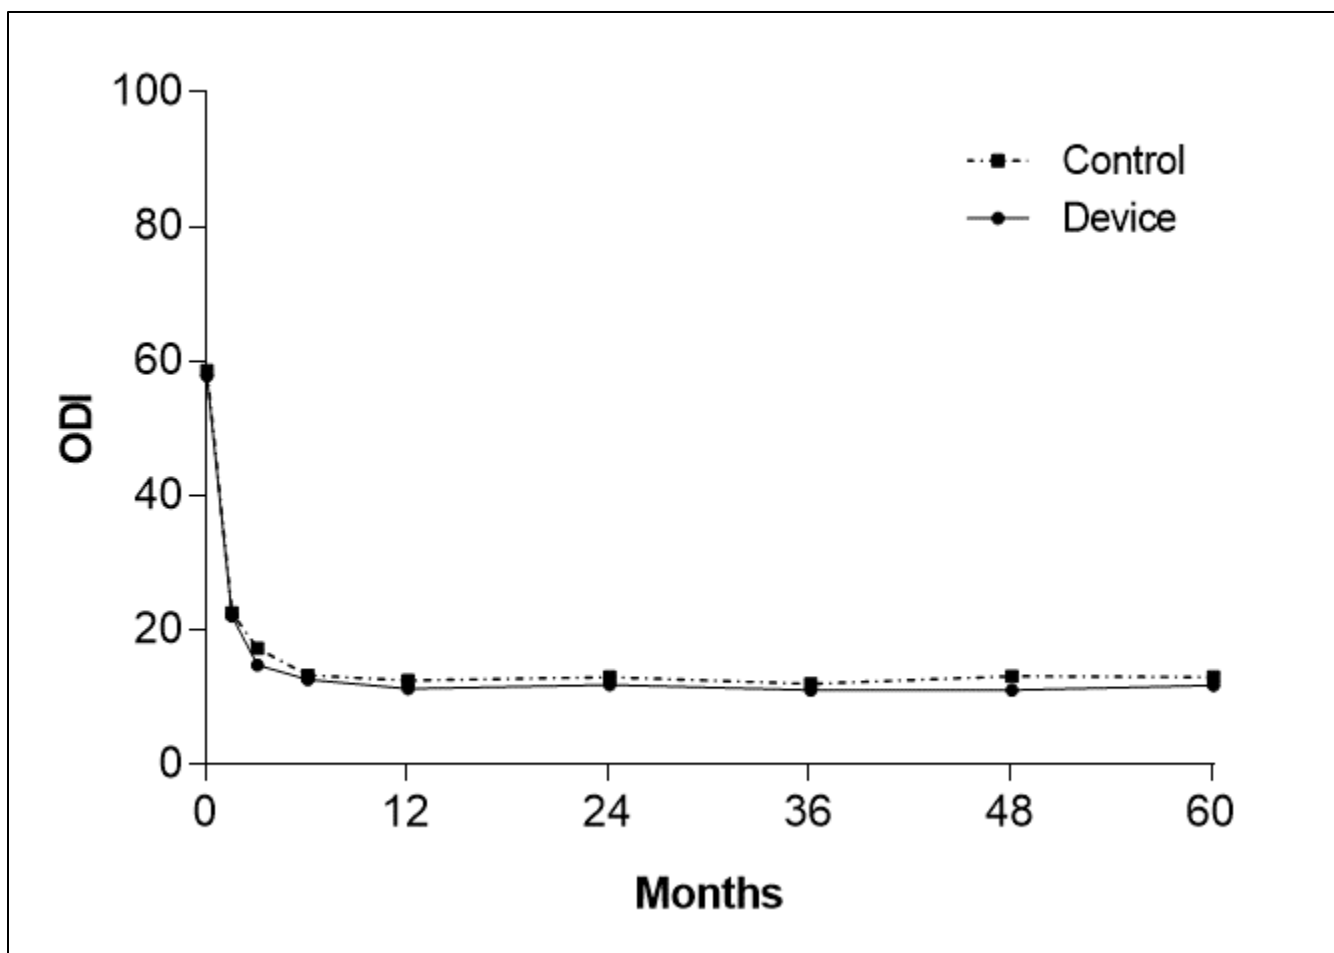

**eFigure 2.** Oswestry Disability Index Score over 5 Years Follow-up.  
ODI=Oswestry Disability Index.

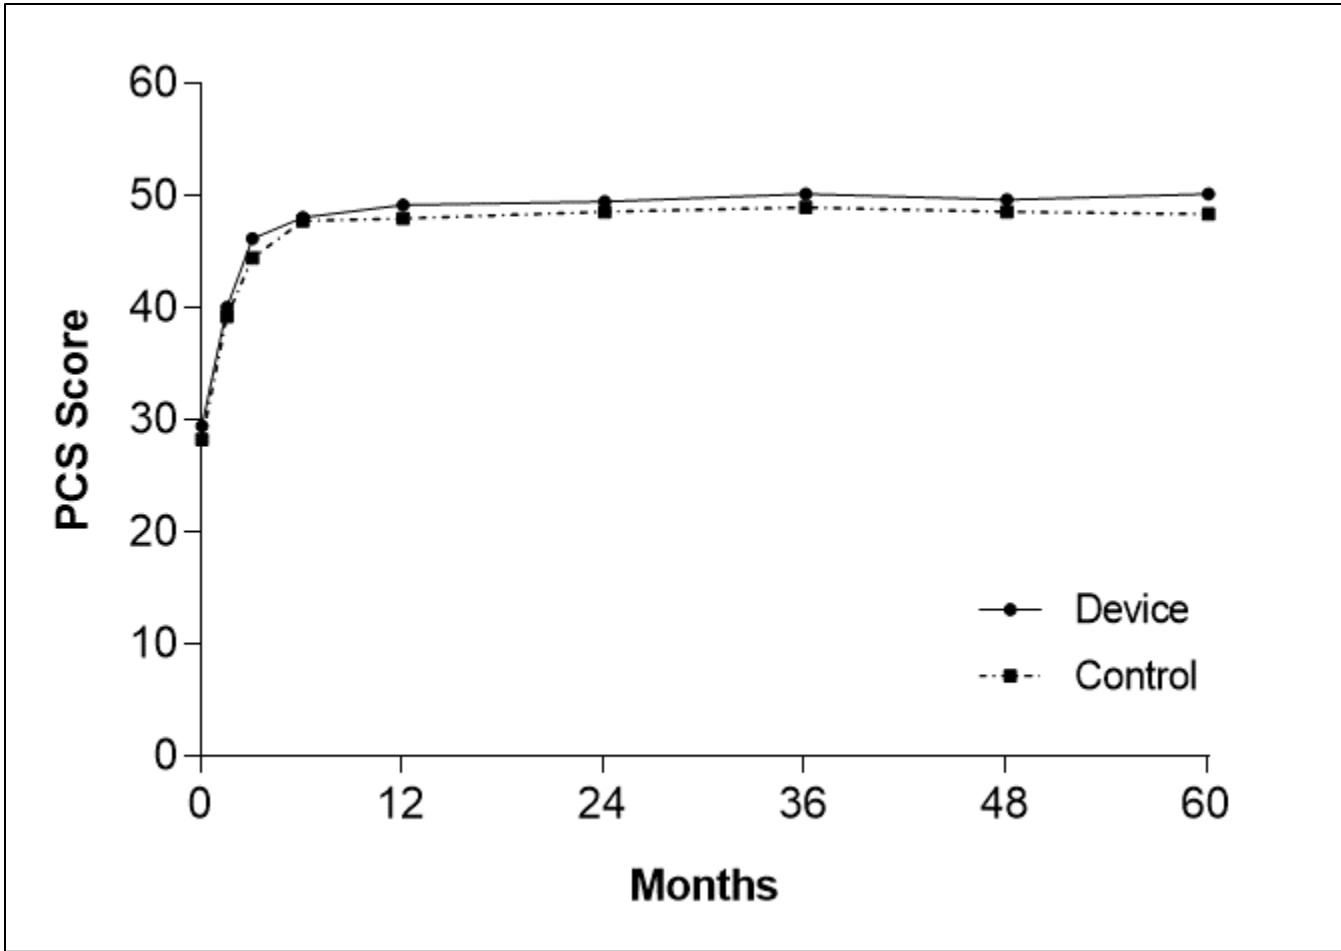

**eFigure 3.** SF-36 Physical Component Summary Score over 5 Years Follow-up. PCS=Physical Component Summary.

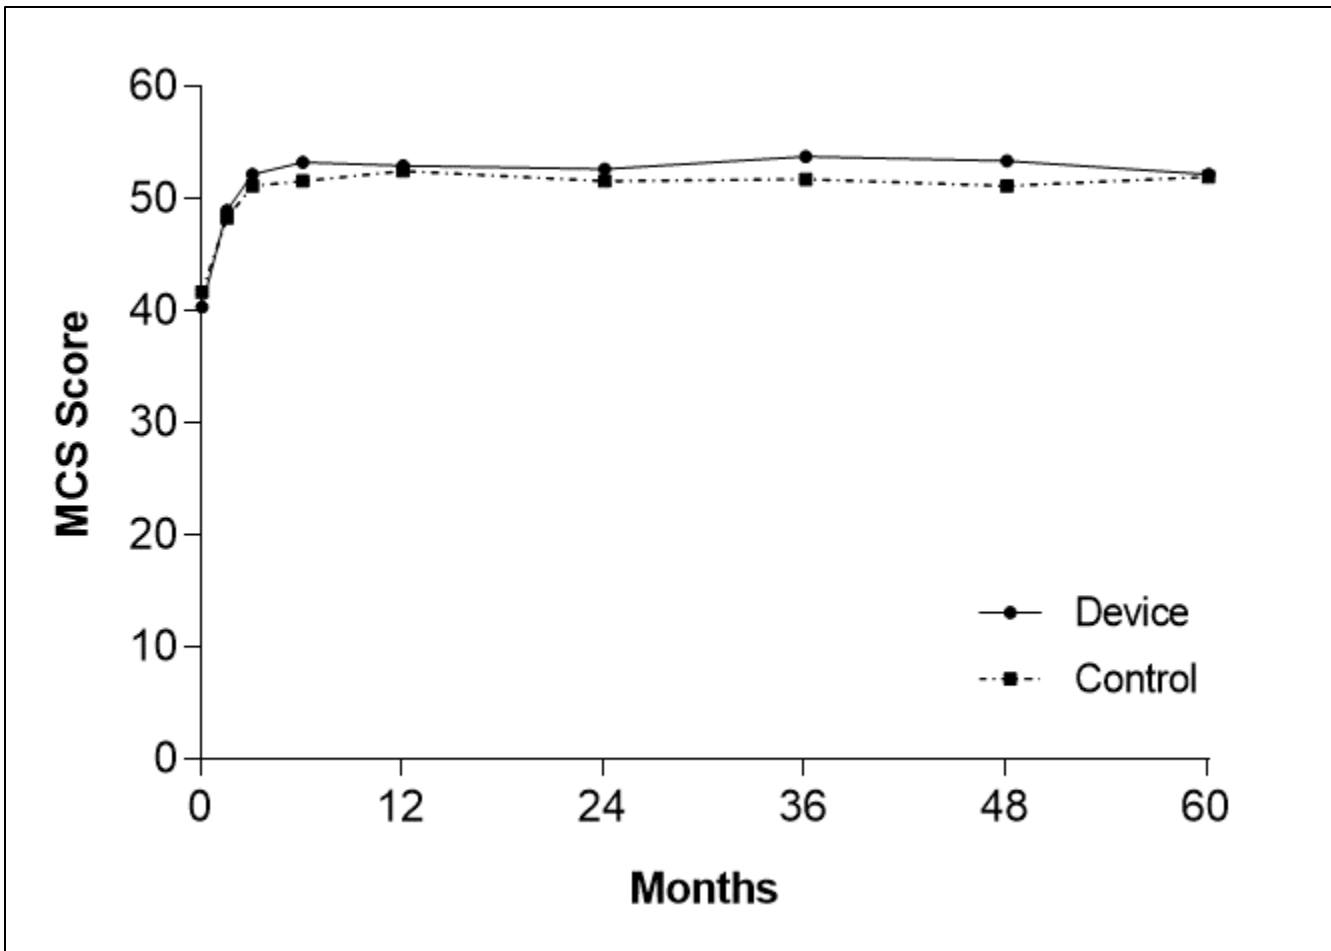

**eFigure 4.** SF-36 Mental Component Summary Score over 5 Years Follow-up. MCS=Mental Component Summary.
