# Supplementary material for: Effectiveness of an Annular Closure Device to Prevent Recurrent Lumbar Disc Herniation: A Secondary Analysis With 5 Years of Follow-up
Source: PubMed Central journal article supplement — JAMA Netw Open. 2021 Dec 9;4(12):e2136809. doi: 10.1001/jamanetworkopen.2021.36809 (PMC8662371; doi:10.1001/jamanetworkopen.2021.36809), 2021-12-09
Supplement: jamanetwopen-e2136809-s004.pdf [file jamanetwopen-e2136809-s004.pdf]

## Data Sharing Statement

Thomé C, Kuršumović A, Klassen PD, et al; for the Annular Closure RCT Study Group.  
Effectiveness of an annular closure device to prevent recurrent lumbar disc herniation. *JAMA Netw Open*. 2021;4(12):e2136809. doi:10.1001/jamanetworkopen.2021.36809

### Data

**Data available:** Dr Kienzler agrees to provide access to the data under reasonable request, including providing the data and cooperating fully in obtaining and providing the data on which the manuscript is based for examination by the editors or their assignees.
